# Supplementary material for: Occurrence of Banned and Currently Used Herbicides, in Groundwater of Northern Greece; A Human Health Risk Assessment Approach
Source: Research Square preprint supplement (doi:10.21203/rs.3.rs-272200/v1), 2021-03-11
Supplement: Supplementary file 1 [file e9a149e64799e77c11e6e6a3.pdf]

Table 3. Summary of positive samples and exceedances of permissible limit.

|       | n  | Percentage of positive samples (%) |      |      |      |     |      | Percentage (%) of samples with concentrations higher than the limit 0.1 ug/L |      |      |      |      |      |
|-------|----|------------------------------------|------|------|------|-----|------|------------------------------------------------------------------------------|------|------|------|------|------|
|       |    | ATR                                | DIA  | DEA  | HA   | MET | TER  | ATR                                                                          | DIA  | DEA  | HA   | MET  | TER  |
| A1    | 4  | 100                                | 60   | 75   | 75   | 100 | 75   | 0                                                                            | 50   | 25   | 25   | 25   | 0    |
| A2    | 4  | 100                                | 60   | 100  | 100  | 100 | 50   | 50                                                                           | 25   | 0    | 0    | 25   | 50   |
| A3    | 4  | 100                                | 60   | 50   | 100  | 100 | 25   | 0                                                                            | 25   | 0    | 0    | 100  | 25   |
| A4    | 4  | 100                                | 100  | 50   | 100  | 100 | 75   | 50                                                                           | 50   | 25   | 25   | 25   | 75   |
| BI    | 5  | 80                                 | 100  | 100  | 80   | 100 | 100  | 60                                                                           | 40   | 40   | 0    | 40   | 100  |
| B2    | 5  | 80                                 | 100  | 100  | 80   | 100 | 60   | 60                                                                           | 40   | 0    | 0    | 0    | 60   |
| B3    | 5  | 100                                | 100  | 100  | 80   | 100 | 80   | 0                                                                            | 100  | 40   | 0    | 0    | 0    |
| B4    | 4  | 100                                | 40   | 100  | 100  | 100 | 50   | 0                                                                            | 50   | 0    | 0    | 0    | 25   |
| B5    | 5  | 100                                | 100  | 100  | 100  | 100 | 80   | 100                                                                          | 100  | 80   | 40   | 60   | 80   |
| C1    | 5  | 100                                | 100  | 100  | 60   | 100 | 80   | 60                                                                           | 100  | 60   | 40   | 60   | 80   |
| C2    | 5  | 100                                | 40   | 100  | 100  | 100 | 80   | 60                                                                           | 40   | 60   | 40   | 60   | 60   |
| Total | 54 | 96.4                               | 78.2 | 88.6 | 88.6 | 100 | 67.5 | 38.0                                                                         | 58.0 | 30.0 | 15.5 | 35.9 | 50.5 |

\*Number of samples per borehole/well
